# Supplementary material
Source: PubMed Central journal article supplement (PMC4178647)
Supplement: AEM.01827-14_zam999105727so1.pdf [file AEM.01827-14_zam999105727so1.pdf]

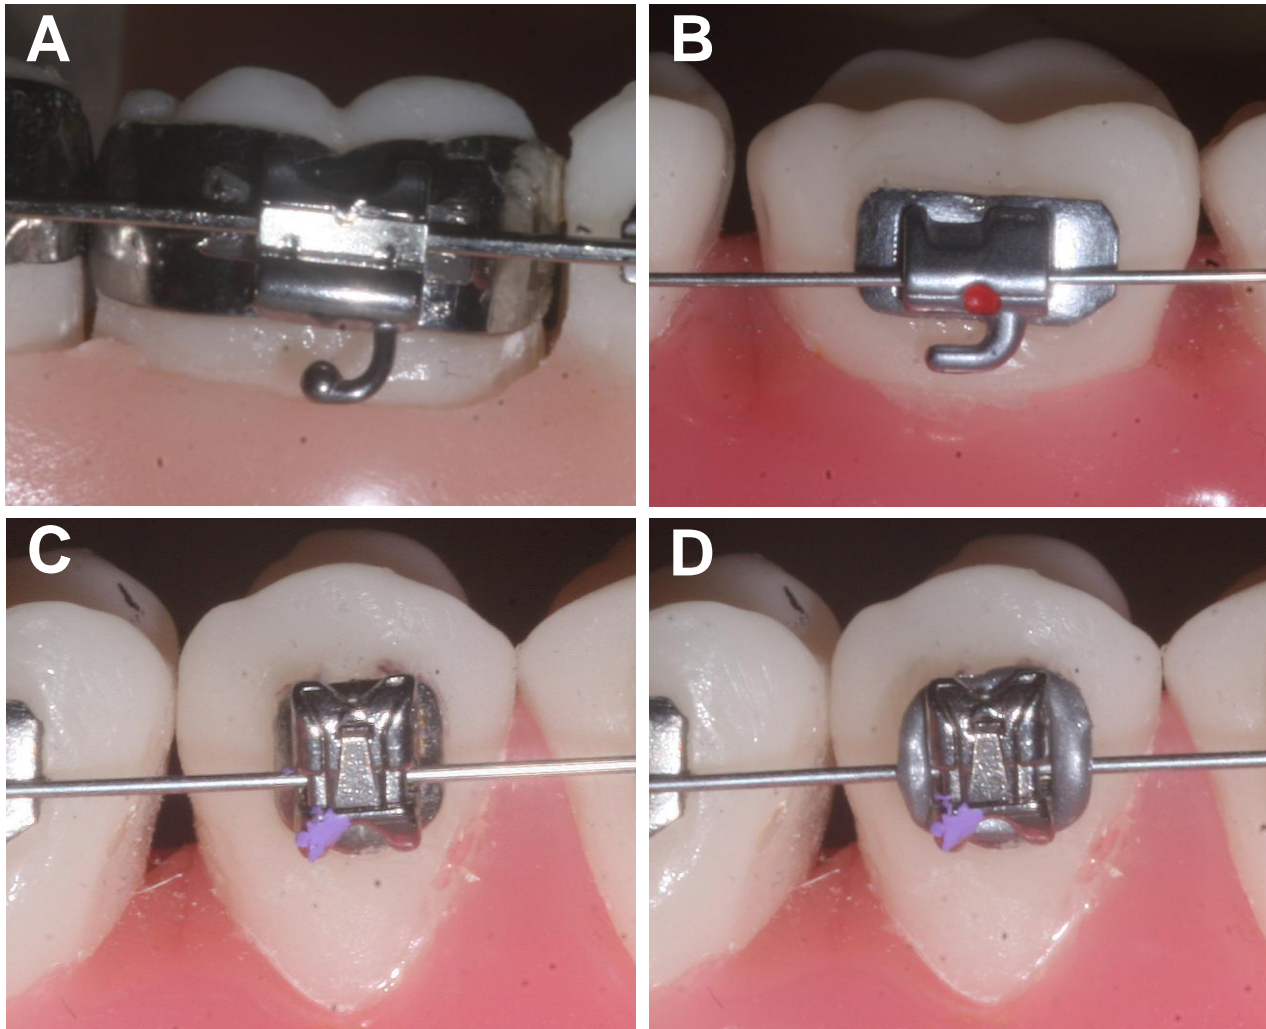

**FIG. S1.** Examples of the components of the orthodontic fixed appliances under test. A, molar band; B, bonded molar tube; C, self-ligating bracket without an elastomeric tie; D, self-ligating bracket with additional elastomeric tie.

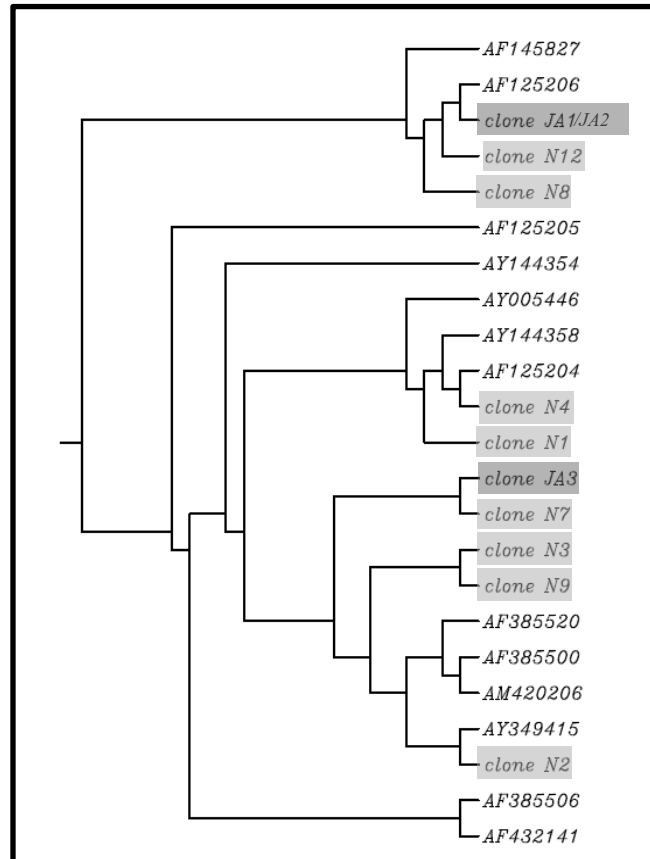

**FIG. S2.** Dendrogram of oral candidate division TM7 phylotypes. The tree was derived from 16S rDNA sequences obtained from mixed cultures of dental plaque in FAB. The sequences were amplified by PCR, and cloned in *E. coli*. The 3 samples shown in this dendrogram as JA1-2-3 were isolated from mixed broth cultures and were clustered in the same dendrogram previously shown in Figure 1B.

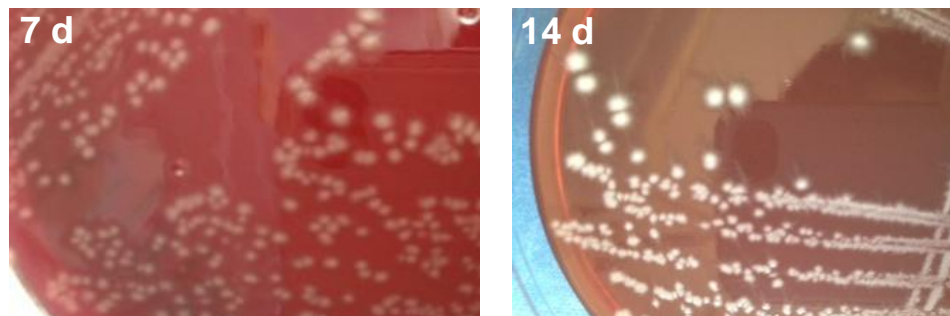

**FIG. S3.** Images of candidate division TM7 strain UB2523 bacterial colonies grown on FAA containing 5% horse blood and cultured anaerobically for 7 d or 14 d at 37°C.

| Peptide sequence       | Matching polypeptide in database                                                                | Accession no. | Query Cover. (%) | Max identity (%) |
|------------------------|-------------------------------------------------------------------------------------------------|---------------|------------------|------------------|
| HYAHVDCPGHADYVK        | Translation elongation factor Tu, partial [candidate division TM7 single-cell isolate TM7a]     | 10155636.1    | 100              | 100              |
| VQLVGDDLFTNTERLEK      | Enolase [candidate division TM7 single-cell isolate TM7a]                                       | 10127055.1    | 88               | 94               |
| AGYTAISSHR             | Enolase [candidate division TM7 single-cell isolate TM7a]                                       | 10127055.1    | 100              | 80               |
| FTAQVYVLTKDEGGR        | GTPase - translation elongation factor [candidate division TM7 single-cell isolate TM7a]        | 10140889.1    | 100              | 80               |
| TKNNPVLIGEPGVGK        | CipB protein [candidate division TM7 single-cell isolate TM7a]                                  | 10129174.1    | 100              | 100              |
| TLSLLLK                | Hypothetical protein, partial [candidate division TM7 single-cell isolate TM7a]                 | 10142391.1    | 85               | 100              |
| FTQAGSEVSALLGR         | F <sub>0</sub> F <sub>1</sub> ATP synthase subunit beta [candidate division TM7 genomosp. GTL1] | 8578629.1     | 100              | 100              |
| VADNTGAKEILTIR         | 50S ribosomal protein L14 [candidate division TM7 genomosp. GTL1]                               | 8578359.1     | 100              | 86               |
| NIALLFEKPSTR           | Ornithine carbamoyltransferase, partial [candidate division TM7 single-cell isolate TM7a]       | 10128854.1    | 100              | 92               |
| MKGILAGGSGTR           | TDP-Glucose pyrophosphorylase, partial [candidate division TM7 single-cell isolate TM7c]        | 10164824.1    | 100              | 100              |
| EVTNLMHNAQSLVK *       | AAA family ATPase, partial [candidate division TM7 single-cell isolate TM7a]                    | 10131744.1    | 100              | 100              |
| LGNIDATINLLTYFGEKSEK * | Hypothetical protein [candidate division TM7 single-cell isolate TM7a]                          | 10128686.1    | 100              | 77               |
| LWDIAQDSIKNNK *        | Hypothetical protein [candidate division TM7 single-cell isolate TM7b]                          | 10163984.1    | 100              | 100              |

**TABLE S1.** Identified peptides obtained from digestion of cell wall/membrane preparations from Candidate Division TM7 strain UB2523 cells. Each peptide analyzed was given the matching protein, accession number, query coverage (%) and maximum identity (%). \* refers to peptides found in HOMD (<http://www.homd.org/>). The other peptides were identified using the BLAST program (<http://blast.ncbi.nlm.nih.gov/Blast>). The raw data files were processed using Proteome Discoverer software v1.2 (Thermo Scientific) and searched against the SwissProt Eubacteria database using the Mascot algorithm.
